# Supplementary material for: Tumor Mutation Burden and Efficacy of EGFR-Tyrosine Kinase Inhibitors in Patients with EGFR -Mutant Lung Cancers
Source: Oxford University Press journal article supplement (doi:10.1158/1078-0432.ccr-18-1102), 2018-07-25
Supplement: 10780432ccr181102-sup-199907_2_supp_4852166_pnwnv3.xlsx [file 10780432ccr181102-sup-199907_2_supp_4852166_pnwnv3.xlsx]

## Sheet: Sheet1
Supplemental Table 1
Radacted and Annotated Full Cohort
* 0 representing ongoing and 1 stopped at the time of study end
** 0 representing surviving and 1 deceased at the time of study end
*** normalized tumor mutational bruden (mutations/Mb)
EGFR Variant	Time on EGFR-TKI (Months)	TKI status*	Overall Survival from start of EGFR-TKI Start (Months)	Survival Status**	TMB***
E746_S752delinsV	3.56667	0	0.8	0	0.943396
E746_A750del	1	0	1	0	2.46
T751_I759delinsN	2.43333	0	2.43333	0	3.28
E746_A750del	2.83333	0	2.83333	0	6.56
E746_A750del	2.83333	1	2.9	0	5.66038
L747_T751delinsPR	3.7	0	3.7	0	4.1
E746_S752delinsV	3.46667	1	4.1	1	6.60377
E746_S752delinsV	2.26667	1	4.2	1	2.83019
L747_T751del	4.2	0	4.2	0	4.1
E746_S752delinsV	3.06667	1	4.53333	1	5.66038
E746_A750del	6.9	0	6.13333	0	1.63934
E746_S752delinsV	3	1	6.26667	0	7.54717
E746_A750del	6.3	1	7.93333	1	0.943396
E746_S752delinsV	15.8333	1	8	0	3.77358
E746_A750del	3.1	1	8.1	1	3.77358
E746_A750del	9.5	0	8.33333	0	0.943396
E746_A750del	8.16667	1	8.56667	1	1.88679
E746_A750del	8.56667	1	8.63333	1	2.04082
E746_S752delinsV	8.63333	1	8.76667	1	6.60377
E746_A750del	8.96667	0	8.93333	0	1.63934
E746_A750del	9.63333	0	9.63333	0	5.66038
E746_S752delinsV	12.2333	1	9.73333	0	2.83019
E746_S752delinsV	8.13333	1	9.73333	1	3.77358
E746_A750del	8.26667	1	9.76667	0	4.08163
E746_A750del	9.83333	0	9.8	0	7.54717
S752_I759del	10.7333	0	10	0	1.88679
E746_A750del	9.73333	1	10.1	1	2.83019
E746_A750del	2.33333	1	10.1667	0	10.2041
E746_A750del	10.1667	0	10.6333	0	4.91803
E746_A750del	10.8	0	11.2667	0	9.83607
E746_T751delinsA	4.73333	1	11.4333	1	5.66038
E746_A750del	11.4333	0	11.9	0	4.71698
E746_A750del	14.3333	0	12.3667	0	2.83019
E746_A750del	12.7333	0	12.6	0	2.83019
E746_A750del	12.6667	0	13.3	0	2.83019
E746_A750del	13.2	0	13.8667	0	7.54717
E746_A750del	14.2333	1	14.2333	1	1.88679
E746_T751delinsA	14.7333	0	14.2667	0	2.83019
E746_A750del	11.2667	1	14.3	0	2.83019
E746_A750del	14.3667	1	14.4667	0	0.943396
E746_T751delinsI	11.8333	1	14.6333	0	0.943396
E746_S752delinsV	3.6	1	14.9	0	4.09836
E746_A750del	10.2333	1	15.1333	0	4.71698
E746_A750del	8.4	1	15.3667	0	3.77358
L747_P753delinsS; AMP	15.3	0	15.5	0	4.71698
E746_T751delinsA	7.83333	1	16.0333	0	0.943396
E746_S752delinsV	15.7	0	16.3	0	4.91803
E746_S752delinsV	4.23333	1	16.7667	0	2.83019
L747_P753delinsS; AMP	13.7667	1	16.8	0	1.88679
L747_A750delinsP; AMP	17.0333	0	17.0333	0	3.77358
L747_A750delinsP; AMP	16.4667	0	17.0667	0	2.83019
E746_A750del	12.8667	1	17.1	1	1.88679
L747_P753delinsS; AMP	8.26667	1	17.1333	1	4.08163
E746_S752delinsV	18.3333	0	18	0	4.71698
E746_S752delinsV	13.5	1	18.8	0	2.83019
E746_T751delinsIP	8.7	1	20.1	0	3.77358
E746_A750del; AMP	10.8	1	20.4667	1	5.10204
E746_A750del	7.8	1	20.6333	1	6.60377
E746_S752delinsV	20.5667	0	21.2333	0	2.83019
E746_S752delinsV	10.0333	1	21.5333	0	2.83019
E746_S752delinsV	21.4667	0	21.8667	0	3.77358
E746_A750del	20.2	1	22.0667	0	4.71698
E746_A750del	21.8667	0	22.3333	0	0.943396
E746_A750del	22.6333	0	22.6333	0	1.88679
E746_A750del	15.9	1	22.7333	0	9.43396
L747_T751del; AMP	19.4667	1	23.1333	1	4.08163
E746_A750del	22.8667	0	23.5667	0	2.83019
E746_A750del	19.6333	1	23.7667	0	1.88679
E746_A750del	26.8333	0	24	0	3.77358
E746_A750del	12.4	1	24.6667	0	3.06122
E746_A750del	26.6667	0	25.4333	0	3.77358
E746_A750del;	19.3	1	25.6667	0	0.943396
E746_A750del	28.3333	0	26.1333	0	1.88679
E746_S752delinsV	26.1333	0	26.5	0	9.43396
E746_S752delinsV; AMP	26.7	0	27.3333	0	2.83019
E746_A750del	27.6	0	27.5333	0	0.943396
E746_A750del	16.9667	1	27.6	0	3.77358
E746_A750del	19.2667	1	28.6333	0	2.45902
E746_A750del; AMP	5.8	1	28.8333	1	8.16327
E746_A750del	16.7333	1	29.3333	1	2.04082
E746_A750del	14.1667	1	30.3	0	7.54717
E746_A750del; AMP	9.53333	1	30.4	0	7.54717
E746_A750del; AMP	29.9	0	30.6	0	4.71698
E746_A750del	30.4333	0	30.8	0	2.04082
E746_A750del	6.76667	1	31.7333	0	2.83019
E746_A750del	23.5333	1	31.9667	0	5.10204
E746_A750del	33.0333	0	33.2333	0	3.06122
E746_A750del	21.4333	1	33.3	1	7.54717
E746_A750del	35.4667	0	33.5667	0	2.04082
E746_A750del	34.6	0	35	0	1.02041
E746_T751delinsI	22.3333	1	35.7667	0	0.943396
E746_A750del	23.4333	1	39.7667	0	2.04082
L747_P753delinsS, S306L	42.0333	1	42.2667	0	9.01639
E746_A750del	1.5	1	48.0333	1	3.06122
L858R	0.433333	1	0.433333	1	0.82
L858R	0.4	1	0.466667	1	16.9811
L858R	1.63333	1	1.63333	1	7.14286
L858R	4.4	1	4.46667	1	7.54717
L858R	5.16667	0	5.16667	0	2.46
L858R; AMP	3.6	1	5.5	1	7.37705
L858R	1.06667	1	6.2	1	9.01639
L858R	5.2	1	6.3	1	0.943396
L858R	4.23333	1	6.3	1	6.60377
L858R	6.96667	1	7.43333	1	6.60377
L858R	7.5	0	7.46667	0	4.09836
L858R	6.76667	1	7.66667	1	5.10204
L858R, T854S	9.63333	1	10.2667	0	7.14286
L858R	8.03333	1	10.4333	1	5.10204
L858R	14.9667	0	10.4667	0	2.83019
L858R, L833V	9.86667	1	11.0333	1	5.10204
L858R	9.03333	1	11.4	0	6.60377
L858R	11.6333	1	11.6667	0	6.60377
L858R	11.7333	0	11.7333	0	4.71698
L858R, E709K	10.7333	1	12.7	1	5.10204
L858R, A289V	14.7333	0	13.1	0	4.71698
L858R	9.33333	1	13.2333	1	4.71698
L858R	7.83333	1	13.3	0	5.66038
L858R	6.66667	1	14	0	2.83019
L858R	8.8	1	14.2333	1	2.83019
L858R	12.7667	1	15.0667	0	2.83019
L858R	16.3667	0	15.6667	0	5.66038
L858R	15.2667	0	15.8667	0	2.83019
L858R	10.9	1	16.1	0	17.9245
L858R, V834L	17.1	1	17.1	1	5.66038
L858R	7.4	1	17.4	0	5.10204
L858R	4.83333	1	18.3333	0	3.77358
L858R	19.0667	1	19.6667	1	8.16327
L858R	14.7	1	20.0667	0	3.77358
L858R	19.9	0	20.3	0	3.77358
L858R, V689M	3.03333	1	20.5	1	9.18367
L858R	12.5333	1	20.5333	0	0.943396
L858R	2.6	1	20.6	0	6.60377
L858R	1.5	1	20.7	1	4.71698
L858R	11.3667	1	21.8667	0	5.66038
L858R	24.3333	0	24.3333	0	2.83019
L858R	5.16667	1	24.6667	0	4.71698
L858R, K860I, K867T	26.4	0	25.8	0	2.83019
L858R, E709K	6.76667	1	26.1333	1	1.88679
L858R	12.6333	1	26.3333	0	2.83019
L858R	25.9667	0	26.5667	0	4.71698
L858R	22.1	1	27.7667	0	10.3774
L858R	12.4667	1	29.2333	1	3.06122
L858R, E709K	19.3	1	30.7667	0	4.71698
L858R	18.4333	1	33.1333	0	2.04082
L858R	36.8333	0	33.5333	0	2.04082
L858R	28.4	1	35.4333	0	3.06122
L858R	34.6	1	36.1667	0	3.06122
L858R	16	1	37.3	0	4.08163
L858R, D1014V	8.83333	1	37.3333	1	4.71698
L858R	14.2	1	40.6	1	2.45902
L858R	42.1	0	41.7667	0	4.91803
L858R; AMP	9.33333	1	43.5333	0	10.6557
L858R	34.1333	1	80.1667	1	6.60377
